# Supplementary material for: Clinical Utility of Prospective Molecular Characterization in Advanced Endometrial Cancer
Source: Oxford University Press journal article supplement (doi:10.1158/1078-0432.ccr-18-0412), 2018-08-01
Supplement: 10780432ccr180412-sup-196580_2_supp_4869283_pbhlhx.docx [file 10780432ccr180412-sup-196580_2_supp_4869283_pbhlhx.docx]

**Table S2. Recurrent cases in MSKCC vs. TCGA cohort.**

| **Histology/Grade** | **MSKCC Recurrent**  **(95%, 180/189)** | **TCGA Recurrent**  **(19%, 71/373)** |
| --- | --- | --- |
| Endometrioid, Grade 1 | 19/19 | 8/89 |
| Endometrioid, Grade 2 | 24/26 | 20/106 |
| Endometrioid, Grade 3 | 26/30 | 25/112 |
| Mixed | 14/15 | 1/13 |
| Serous | 45/46 | 18/53 |
| Clear Cell | 12/13 | - |
| MMMT | 35/35 | - |
| Other | 5/5 | - |
