# Supplementary material for: Clinical Utility of Prospective Molecular Characterization in Advanced Endometrial Cancer
Source: Oxford University Press journal article supplement (doi:10.1158/1078-0432.ccr-18-0412), 2018-08-01
Supplement: 10780432ccr180412-sup-196580_2_supp_4906044_pc4r4f.docx [file 10780432ccr180412-sup-196580_2_supp_4906044_pc4r4f.docx]

**TABLE LEGENDS: Supplementary Tables**

**Table S1. Additional clinical information for patients in MSKCC cohort**

**Table S2. Recurrent cases in MSKCC vs. TCGA cohort**

**Table S3. Clinical and genetic characteristics of somatic copy number alteration clusters**

**FIGURE LEGENDS: Supplementary Figures**

**Figure S1. Progression-free survival and hazard ratios by histology**

**Figure S2. Comparison of most recurrently mutated genes in MSKCC vs. TCGA cohort**

**Figure S3. Mutation cancer cell fraction (CCF) comparisons between matched pairs of primary tumor and metastasis**

VUS=variant of uncertain significance

**Figure S4. Reanalysis of TCGA high copy number burden cluster four. A. Ploidy and purity corrected clustering of SCNAs. B. Comparison of PFS between the two clusters identified in S4A.**
